# Supplementary material for: A complex health services intervention to improve medical care in long-term care homes: study protocol of the controlled coordinated medical care (CoCare) study
Source: BMC Health Serv Res. 2019 May 24;19:332. doi: 10.1186/s12913-019-4156-4 (PMC6534891; doi:10.1186/s12913-019-4156-4)
Supplement: Supplementary file 4 — NH resident questionnaire. (PDF 338 kb) [file 12913_2019_4156_MOESM4_ESM.pdf]

---

Project  
Extended coordinated medical care in nursing homes  
(CoCare)

---

# Questionnaire for nursing home residents

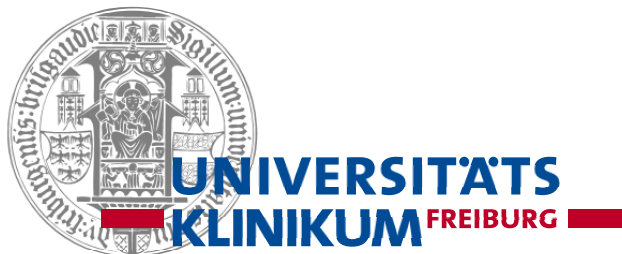

Section of Health Care Research and Rehabilitation  
Research

Please turn over

# Instructions for completing the questionnaire

In this questionnaire, we'd like to know more about your nursing home and the medical care you receive there. Other topics will cover how you perceive your health and quality of life, as well as some general personal questions. Completing the questionnaire will take about 30 minutes.

Please answer these questions one after another in the sequence they appear on the questionnaire. **Please don't skip any questions.**

If you have trouble filling out the questionnaire by yourself, feel free to ask a relative or another person to help you. However, this person shouldn't influence your answers in any direction. We ask that nursing staff or doctors do not help you complete this questionnaire, as we would like to know what **you** think.

- ✓ You will answer most of the questions by checking a box. Please **check only one box per question.**
- ✓ **Please choose one of the options provided!** For some questions, you may need to fill in dates, numbers or words.
- ✓ If you feel like a question doesn't apply to you, **please check a box regardless.** Most of the time, one of the options provided will be an appropriate answer, e.g. "don't know" or "doesn't apply".
- ✓ A few questions will be very similar to one another, since this questionnaire consists of several shorter questionnaires. **Please answer all the questions regardless of repetition.**
- ✓ In case you need to correct an answer (i.e. you accidentally checked the wrong box), please do so by filling in the falsely checked box completely. You may now check the correct box:

| <b>Example question:</b>                          | strongly agree           | agree                               | agree some-what                     | disagree some-what       | dis-agree                | strongly dis-agree       |
|---------------------------------------------------|--------------------------|-------------------------------------|-------------------------------------|--------------------------|--------------------------|--------------------------|
| <i>I actively participated in the discussion.</i> | <input type="checkbox"/> | <input checked="" type="checkbox"/> | <input checked="" type="checkbox"/> | <input type="checkbox"/> | <input type="checkbox"/> | <input type="checkbox"/> |

**Thank you for taking the time to participate in this survey!**

# Evaluate your nursing home

The following questions will ask you to assess the cooperation between doctors and nursing staff in your facility.

Please indicate to which extent the following statements apply to you.

|                                                                                                                                                                                                                                                                                                                                                                                                                                                                  | don't know               | strongly disagree        | disagree                 | agree                    | strongly agree           |   |
|------------------------------------------------------------------------------------------------------------------------------------------------------------------------------------------------------------------------------------------------------------------------------------------------------------------------------------------------------------------------------------------------------------------------------------------------------------------|--------------------------|--------------------------|--------------------------|--------------------------|--------------------------|---|
|                                                                                                                                                                                                                                                                                                                                                                                                                                                                  | <input type="checkbox"/> | 1 |
| <p><b>Questions 1 through 3 are adapted from a questionnaire assessing work satisfaction for doctors (Fragebogen zur Arbeitssituation von Ärzten; FAÄ):</b></p> <p>Fischbeck, S., &amp; Laubach, W. (2005). Arbeitssituation und Mitarbeiterzufriedenheit in einem Universitätsklinikum: Entwicklung von Messinstrumenten für ärztliches und pflegerisches Personal. <i>PPmP-Psychotherapie · Psychosomatik · Medizinische Psychologie</i>, 55(06), 305-314.</p> |                          |                          |                          |                          |                          |   |
|                                                                                                                                                                                                                                                                                                                                                                                                                                                                  | <input type="checkbox"/> | 2 |
|                                                                                                                                                                                                                                                                                                                                                                                                                                                                  | <input type="checkbox"/> | 3 |
|                                                                                                                                                                                                                                                                                                                                                                                                                                                                  | <input type="checkbox"/> | 4 |
|                                                                                                                                                                                                                                                                                                                                                                                                                                                                  | <input type="checkbox"/> | 5 |
| <p><b>Questions 4 through 9 are adapted from the Internal Participation Scale (IPS):</b></p> <p>Körner, M., &amp; Wirtz, M. A. (2013). Development and psychometric properties of a scale for measuring internal participation from a patient and health care professional perspective. <i>BMC health services research</i>, 13(1), 374.</p>                                                                                                                     |                          |                          |                          |                          |                          |   |
|                                                                                                                                                                                                                                                                                                                                                                                                                                                                  | <input type="checkbox"/> | 6 |
|                                                                                                                                                                                                                                                                                                                                                                                                                                                                  | <input type="checkbox"/> | 7 |
|                                                                                                                                                                                                                                                                                                                                                                                                                                                                  | <input type="checkbox"/> | 8 |
|                                                                                                                                                                                                                                                                                                                                                                                                                                                                  | <input type="checkbox"/> | 9 |
|                                                                                                                                                                                                                                                                                                                                                                                                                                                                  | 1                        | 2                        | 3                        | 4                        | 5                        |   |

**With these next few questions, we'd like to see how satisfied you are with your facility and the care you receive there.**

**Please indicate to which extent the following statements apply to you.**

|  | no                       | mostly no                | mostly yes               | yes                      |    |
|--|--------------------------|--------------------------|--------------------------|--------------------------|----|
|  | <input type="checkbox"/> | <input type="checkbox"/> | <input type="checkbox"/> | <input type="checkbox"/> | 10 |
|  | <input type="checkbox"/> | <input type="checkbox"/> | <input type="checkbox"/> | <input type="checkbox"/> | 11 |
|  | <input type="checkbox"/> | <input type="checkbox"/> | <input type="checkbox"/> | <input type="checkbox"/> | 12 |
|  | <input type="checkbox"/> | <input type="checkbox"/> | <input type="checkbox"/> | <input type="checkbox"/> | 13 |
|  | <input type="checkbox"/> | <input type="checkbox"/> | <input type="checkbox"/> | <input type="checkbox"/> | 14 |
|  | 1                        | 2                        | 3                        | 4                        |    |
|  | very dissatisfied        | mostly dissatisfied      | mostly satisfied         | very satisfied           |    |
|  | <input type="checkbox"/> | <input type="checkbox"/> | <input type="checkbox"/> | <input type="checkbox"/> | 15 |
|  | <input type="checkbox"/> | <input type="checkbox"/> | <input type="checkbox"/> | <input type="checkbox"/> | 16 |
|  | 1                        | 2                        | 3                        | 4                        |    |

**Questions 10 through 16 are adapted from a questionnaire assessing satisfaction of relatives with the medical care received in nursing homes (Zufriedenheit von Angehörigen mit der Versorgung in stationären Altenpflegeeinrichtungen; ZUF-A-7):**

Kriz, D., Schmidt, J., & Nübling, R. (2006). Zufriedenheit von Angehörigen mit der Versorgung in stationären Altenpflegeeinrichtungen. Entwicklung des Screening-Fragebogens ZUF-A-7. *Pflege*, 19(2), 88-96.

## Assess your medical consultations

How would you describe your behavior while consulting with your doctors?

Passive might mean you wait for doctors to let you know what they want to speak about and not express concerns.

Active might mean you ask questions and express opinions and concerns.

☐

1

Very passive

17

☐

2

Mostly passive

☐

3

Mostly active

☐

4

Very active

The following questions concern the medical care you receive in your facility.

Are you able to see a general practitioner whenever necessary?

Yes

☐

1

No

☐

2

18

Are you able to see a specialist whenever necessary? (Specialists are specialized doctors like neurologists, urologists, pain therapists or dermatologists.)

Yes

☐

1

No

☐

2

I don't need to see  
a specialist.

☐

3

19

very dissatisfied

☐

mostly dissatisfied

☐

mostly satisfied

☐

very satisfied

☐

20

Question 20 is adapted from ZUF-A-7, see citation above.

# Quality of Life

| Please choose only <i>one</i> option per question.                                                                                                                                                                       |                          |                          |                          |                          |                          |    |
|--------------------------------------------------------------------------------------------------------------------------------------------------------------------------------------------------------------------------|--------------------------|--------------------------|--------------------------|--------------------------|--------------------------|----|
|                                                                                                                                                                                                                          | Not at all               | A little                 | A moderate amount        | Very much                | An extreme amount        |    |
|                                                                                                                                                                                                                          | <input type="checkbox"/> | 21 |
|                                                                                                                                                                                                                          | <input type="checkbox"/> | 22 |
|                                                                                                                                                                                                                          | <input type="checkbox"/> | 23 |
|                                                                                                                                                                                                                          | <input type="checkbox"/> | 24 |
| <p><b>Questions 21 through 29 are the WHO Quality of Life questionnaire for the elderly (WHOQOL-OLD):</b></p> <p>World Health Organization. (2006). WHOQOL-OLD Manual. <i>Copenhagen: World Health Organization.</i></p> |                          |                          |                          |                          |                          | 25 |
|                                                                                                                                                                                                                          | <input type="checkbox"/> | 26 |
|                                                                                                                                                                                                                          | <input type="checkbox"/> | 27 |
|                                                                                                                                                                                                                          | <input type="checkbox"/> | 28 |
|                                                                                                                                                                                                                          | <input type="checkbox"/> | 29 |
|                                                                                                                                                                                                                          | 1                        | 2                        | 3                        | 4                        | 5                        |    |

| Please choose only <i>one</i> option per question.                           |                          |                          |                          |                          |                          |    |
|------------------------------------------------------------------------------|--------------------------|--------------------------|--------------------------|--------------------------|--------------------------|----|
|                                                                              | Not at all               | A little                 | Moderately               | Mostly                   | Completely               |    |
|                                                                              | <input type="checkbox"/> | 30 |
|                                                                              | <input type="checkbox"/> | 31 |
| <p><b>Questions 30 through 34 are the WHOQOL-OLD, see citation above</b></p> |                          |                          |                          |                          |                          | 32 |
|                                                                              | <input type="checkbox"/> | 33 |
|                                                                              | <input type="checkbox"/> | 34 |
|                                                                              | 1                        | 2                        | 3                        | 4                        | 5                        |    |

| Please choose only <i>one</i> option per question.             |                          |                          |                                             |                          |                          |    |
|----------------------------------------------------------------|--------------------------|--------------------------|---------------------------------------------|--------------------------|--------------------------|----|
|                                                                | Very<br>dissatisfied     | Dissatisfied             | Neither<br>satisfied<br>nor<br>dissatisfied | Satisfied                | Very<br>satisfied        |    |
|                                                                | <input type="checkbox"/> | <input type="checkbox"/> | <input type="checkbox"/>                    | <input type="checkbox"/> | <input type="checkbox"/> | 35 |
|                                                                | <input type="checkbox"/> | <input type="checkbox"/> | <input type="checkbox"/>                    | <input type="checkbox"/> | <input type="checkbox"/> | 36 |
| Questions 35 through 40 are the WHOQOL-OLD, see citation above |                          |                          |                                             |                          |                          | 37 |
|                                                                | <input type="checkbox"/> | <input type="checkbox"/> | <input type="checkbox"/>                    | <input type="checkbox"/> | <input type="checkbox"/> | 38 |
|                                                                | <input type="checkbox"/> | <input type="checkbox"/> | <input type="checkbox"/>                    | <input type="checkbox"/> | <input type="checkbox"/> | 39 |
|                                                                | <input type="checkbox"/> | <input type="checkbox"/> | <input type="checkbox"/>                    | <input type="checkbox"/> | <input type="checkbox"/> | 40 |
|                                                                | 1                        | 2                        | 3                                           | 4                        | 5                        |    |

| Please choose only <i>one</i> option per question.             |                          |                          |                          |                          |                          |    |
|----------------------------------------------------------------|--------------------------|--------------------------|--------------------------|--------------------------|--------------------------|----|
|                                                                | Not at all               | A little                 | Moderately               | Mostly                   | Completely               |    |
|                                                                | <input type="checkbox"/> | 41 |
|                                                                | <input type="checkbox"/> | 42 |
| Questions 41 through 44 are the WHOQOL-OLD, see citation above |                          |                          |                          |                          |                          | 43 |
|                                                                | <input type="checkbox"/> | 44 |
|                                                                | 1                        | 2                        | 3                        | 4                        | 5                        |    |

# Health

The following are questions about your health.

Choose one option per question.

**In general, would you say your health is:**

☐ 1

Excellent

45

☐ 2

Very good

☐ 3

Good

☐ 4

Fair

☐ 5

Poor

**Compared to one year ago, how would you rate your overall health now?**

☐ 1

Much better now than one year ago

46

☐ 2

Somewhat better now than one year ago

☐ 3

About the same

☐ 4

Somewhat worse now than one year ago

☐ 5

Much worse now than one year ago

## Personal information

When reporting results of a project, we need to describe the participants of the study. In order to do that, we'd like to ask you the following personal questions.

### When did you complete this questionnaire?

Date

|  |  |  |  |  |  |  |  |  |  |
|--|--|--|--|--|--|--|--|--|--|
|  |  |  |  |  |  |  |  |  |  |
|--|--|--|--|--|--|--|--|--|--|

47

### Your gender

☐

Male

1

☐

Female

2

48

### Your nationality

☐

German

1

☐

Other

2

49

### How old are you?

☐

1

Under 59 years old

50

☐

2

60 to 64 years old

☐

3

65 to 69 years old

☐

4

70 to 74 years old

☐

5

75 to 79 years old

☐

6

80 to 84 years old

☐

7

85 to 89 years old

☐

8

90 years or older

### Do you have relatives that visit you?

☐

1

Yes

51

☐

2

No

☐

3

I have no relatives

### What is the highest degree or level of schooling you have completed?

- |                          |   |                                                                                                                 |    |
|--------------------------|---|-----------------------------------------------------------------------------------------------------------------|----|
| <input type="checkbox"/> | 1 | No schooling completed                                                                                          | 52 |
| <input type="checkbox"/> | 2 | Grade school or Certificate of Secondary Education (9yrs of education)                                          |    |
| <input type="checkbox"/> | 3 | General Certificate of Secondary Education (GCSE, 10yrs of education)                                           |    |
| <input type="checkbox"/> | 4 | High school (former GDR equivalent of GCSE, 10yrs of education)                                                 |    |
| <input type="checkbox"/> | 5 | „Fachhochschulreife“, „Fachoberschule“ (Advanced technical college admissions certificate, 12 yrs of education) |    |
| <input type="checkbox"/> | 6 | General qualification for university entrance, „Abitur“ (12-13 yrs of education)                                |    |
| <input type="checkbox"/> | 7 | Other                                                                                                           |    |

### How long have you been living in your facility?

- |                          |   |                                        |    |
|--------------------------|---|----------------------------------------|----|
| <input type="checkbox"/> | 1 | Less than six months                   | 53 |
| <input type="checkbox"/> | 2 | More than six months, less than a year |    |
| <input type="checkbox"/> | 3 | One to two years                       |    |
| <input type="checkbox"/> | 4 | More than two years                    |    |

### Did anyone help you complete this questionnaire?

- |                          |   |                                                                       |    |
|--------------------------|---|-----------------------------------------------------------------------|----|
| <input type="checkbox"/> | 1 | No one, I answered all questions and indicated all answers by myself. | 54 |
| <input type="checkbox"/> | 2 | Relative                                                              |    |
| <input type="checkbox"/> | 3 | Friend or acquaintance                                                |    |
| <input type="checkbox"/> | 4 | Somebody else                                                         |    |

Please specify: \_\_\_\_\_

55

**End of questionnaire.**

**Thanks so much for completing the questionnaire and participating in our survey!**
