# Supplementary material for: A complex health services intervention to improve medical care in long-term care homes: study protocol of the controlled coordinated medical care (CoCare) study
Source: BMC Health Serv Res. 2019 May 24;19:332. doi: 10.1186/s12913-019-4156-4 (PMC6534891; doi:10.1186/s12913-019-4156-4)
Supplement: Supplementary file 7 — Doctor questionnaire follow-up. (PDF 311 kb) [file 12913_2019_4156_MOESM7_ESM.pdf]

Project  
Extended coordinated medical care in nursing homes  
(CoCare)

# Questionnaire for doctors 2<sup>nd</sup> survey (follow-up)

**Intervention group**

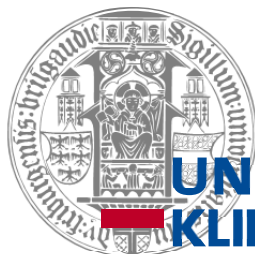

**UNIVERSITÄTS  
KLINIKUM** **FREIBURG**

Section of Health Care Research and Rehabilitation  
Research

# Instructions for completing the questionnaire

With the following questions, we'd like to know more about your work in the enrolled nursing home and how you experience the cooperation with nursing staff.

Please answer these questions one after another in the sequence they appear on the questionnaire. **Please don't skip any questions.**

- ✓ You will answer most of the questions by checking a box. Please **check only one box per question.**
- ✓ **Please choose one of the options provided!** For some questions, you may need to fill in dates, numbers or text.
- ✓ If you feel like a question doesn't apply to you, **please check a box regardless.** Most of the time, one of the options provided will be an appropriate answer, e.g. "don't know" or "doesn't apply".
- ✓ A few questions will be very similar to one another, since this questionnaire consists of several shorter questionnaires. **Please answer all the questions regardless of repetition.**
- ✓ In case you need to correct an answer (i.e. you accidentally checked the wrong box), please do so by filling in the falsely checked box completely. You may now check the correct box:

| <b><u>Example question:</u></b>                   | strongly agree           | agree                               | agree somewhat                      | disagree somewhat        | disagree                 | strongly disagree        |
|---------------------------------------------------|--------------------------|-------------------------------------|-------------------------------------|--------------------------|--------------------------|--------------------------|
| <i>I actively participated in the discussion.</i> | <input type="checkbox"/> | <input checked="" type="checkbox"/> | <input checked="" type="checkbox"/> | <input type="checkbox"/> | <input type="checkbox"/> | <input type="checkbox"/> |

**Thank you for taking the time to participate in this survey!**

## Assessment of cooperation

The following questions concern the collaboration of all enrolled nursing staff and general practitioners/specialists involved in caring for nursing home residents. Please indicate to which extent the following statements apply to you.

Please refer your answers to the time **since CoCare has been implemented** at your facility.

| Please choose only <i>one</i> option per item.                                                                                                                                                                                                                                                                                 |                          |                          |                          |                          |                          |   |
|--------------------------------------------------------------------------------------------------------------------------------------------------------------------------------------------------------------------------------------------------------------------------------------------------------------------------------|--------------------------|--------------------------|--------------------------|--------------------------|--------------------------|---|
|                                                                                                                                                                                                                                                                                                                                | strongly disagree        | disagree                 | agree                    | strongly agree           | don't know               |   |
|                                                                                                                                                                                                                                                                                                                                | <input type="checkbox"/> | 1 |
|                                                                                                                                                                                                                                                                                                                                | <input type="checkbox"/> | 2 |
| <b>Questions 1 through 6 are adapted from the Internal Participation Scale (IPS):</b><br>Körner, M., & Wirtz, M. A. (2013). Development and psychometric properties of a scale for measuring internal participation from a patient and health care professional perspective. <i>BMC health services research</i> , 13(1), 374. |                          |                          |                          |                          |                          | 3 |
|                                                                                                                                                                                                                                                                                                                                | <input type="checkbox"/> | 4 |
|                                                                                                                                                                                                                                                                                                                                | <input type="checkbox"/> | 5 |
|                                                                                                                                                                                                                                                                                                                                | <input type="checkbox"/> | 6 |
|                                                                                                                                                                                                                                                                                                                                | 1                        | 2                        | 3                        | 4                        | 5                        |   |

The following questions concern the collaboration with nursing staff at the facility you provide medical care for. Please choose one of the response options and indicate to which extent the chosen option applies to you.

Please refer your answers to the time **since CoCare has been implemented** at your facility.

|                          |                          |                          |                          |                          |                          |                          |
|--------------------------|--------------------------|--------------------------|--------------------------|--------------------------|--------------------------|--------------------------|
|                          |                          |                          |                          |                          |                          |                          |
| <b>very good</b>         |                          |                          |                          |                          |                          | <b>very poor</b> 7       |
| <input type="checkbox"/> |
| <b>1</b>                 | <b>2</b>                 | <b>3</b>                 | <b>4</b>                 | <b>5</b>                 | <b>6</b>                 |                          |
| 1                        | 2                        | 3                        | 4                        | 5                        | 6                        |                          |

|                          |  |                  |                          |  |  |
|--------------------------|--|------------------|--------------------------|--|--|
|                          |  |                  |                          |  |  |
| <b>very good</b>         |  | <b>very poor</b> | <b>don't know</b> 8      |  |  |
| <input type="checkbox"/> |  |                  | <input type="checkbox"/> |  |  |
| <b>1</b>                 |  |                  | <b>7</b>                 |  |  |
| 1                        |  |                  | 7                        |  |  |

Questions 7 through 12 are adapted from a questionnaire assessing work satisfaction for doctors (Fragebogen zur Arbeitssituation von Ärzten; FAÄ):

Fischbeck, S., & Laubach, W. (2005). Arbeitssituation und Mitarbeiterzufriedenheit in einem Universitätsklinikum: Entwicklung von Messinstrumenten für ärztliches und pflegerisches Personal. *PPmP-Psychotherapie · Psychosomatik · Medizinische Psychologie*, 55(06), 305-314.

|                          |                          |                          |                          |                          |                          |
|--------------------------|--------------------------|--------------------------|--------------------------|--------------------------|--------------------------|
|                          |                          |                          |                          |                          |                          |
| <b>very much</b>         |                          |                          |                          |                          | <b>very little</b> 9     |
| <input type="checkbox"/> |
| <b>1</b>                 | <b>2</b>                 | <b>3</b>                 | <b>4</b>                 | <b>5</b>                 | <b>6</b>                 |
| 1                        | 2                        | 3                        | 4                        | 5                        | 6                        |

|                          |                          |                          |                          |                          |                          |
|--------------------------|--------------------------|--------------------------|--------------------------|--------------------------|--------------------------|
|                          |                          |                          |                          |                          |                          |
| <b>very much</b>         |                          |                          |                          |                          | <b>very little</b> 10    |
| <input type="checkbox"/> |
| <b>1</b>                 | <b>2</b>                 | <b>3</b>                 | <b>4</b>                 | <b>5</b>                 | <b>6</b>                 |
| 1                        | 2                        | 3                        | 4                        | 5                        | 6                        |

very much

1

2

3

4

5

6

1

2

3

4

5

6

very little

11

absolutely sufficient

1

2

3

4

5

6

1

2

3

4

5

6

absolutely insufficient

12

Page 5 of 11

## Project satisfaction

In the past few months, CoCare has introduced a number of measures to improve medical care at nursing home facilities. Please assess how useful those measures were to you and your nursing home with these following questions.

### How useful was the preparation of rounds by nursing staff or nursing home coordinators?

☐ 1

Very useful

13

☐ 2

Useful

☐ 3

Hardly useful

☐ 4

Not useful at all

☐ 5

To my knowledge, rounds weren't prepared by nursing staff.

### How useful was the joint documentation in CoCare-Cockpit (patients' shared medical records)?

☐ 1

Very useful

14

☐ 2

Useful

☐ 3

Hardly useful

☐ 4

Not useful at all

☐ 5

To my knowledge, there was no documentation in CoCare-Cockpit.

### How useful was having (a) fixed point/s of contact among nursing staff at the facility?

☐ 1

Very useful

15

☐ 2

Useful

☐ 3

Hardly useful

☐ 4

Not useful at all

☐ 5

To my knowledge, there was no fixed point of contact.

**How useful were case conferences with doctors and assigned nursing staff?**

☐1

Very useful

16

☐2

Useful

☐3

Hardly useful

☐4

Not useful at all

☐5

To my knowledge, no case conferences were held with doctors and assigned nursing staff, even though they might have been beneficial.

☐6

Not applicable

**How useful were CoCare-recommended standard courses of treatment?**

☐1

Very useful

17

☐2

Useful

☐3

Hardly useful

☐4

Not useful at all

☐5

I don't know any CoCare-recommended standard courses of treatment.

**How useful was the coordinated catheter management (insertion or change of suprapubic catheters at the facility, availability of portable ultrasound machines upon doctor's request)?**

☐1

Very useful

18

☐2

Useful

☐3

Hardly useful

☐4

Not useful at all

☐5

To my knowledge, there was no coordinated catheter management.

**How useful was the coordinated medication management (regularly scheduled medication checks, interdisciplinary medication plans)?**

☐1

Very useful

19

☐2

Useful

☐3

Hardly useful

☐4

Not useful at all

☐5

To my knowledge, no coordinated medication management was implemented at the facility.

### You are enrolled in project CoCare as a...

☐

General practitioner

→ as a general practitioner, please continue to answer the following questions.

1

☐

Specialist

→ as a specialist, please skip the next few questions and continue with the last question on **page 9**.

2

20

### Questions for general practitioners only

#### How useful was the consolidation of general practitioners into GP-teams?

☐

1

Very useful

21

☐

2

Useful

☐

3

Hardly useful

☐

4

Not useful at all

☐

5

To my knowledge, there were no GP-teams.

#### How useful did you find the quarterly meetings with nursing home coordinators and the GP-team?

☐

1

Very useful

22

☐

2

Useful

☐

3

Hardly useful

☐

4

Not useful at all

☐

5

To my knowledge, no quarterly meetings were held.

### Questions for general practitioners only

#### How useful did you find the weekly rounds with nursing staff and other general practitioners?

- |                                       |                                                                                            |    |
|---------------------------------------|--------------------------------------------------------------------------------------------|----|
| <input type="checkbox"/> <sub>1</sub> | Very useful                                                                                | 23 |
| <input type="checkbox"/> <sub>2</sub> | Useful                                                                                     |    |
| <input type="checkbox"/> <sub>3</sub> | Hardly useful                                                                              |    |
| <input type="checkbox"/> <sub>4</sub> | Not useful at all                                                                          |    |
| <input type="checkbox"/> <sub>5</sub> | To my knowledge, there were no weekly rounds with nursing staff and general practitioners. |    |

#### How useful were the CoCare training courses for nursing staff and doctors?

- |                                       |                                                    |    |
|---------------------------------------|----------------------------------------------------|----|
| <input type="checkbox"/> <sub>1</sub> | Very useful                                        | 24 |
| <input type="checkbox"/> <sub>2</sub> | Useful                                             |    |
| <input type="checkbox"/> <sub>3</sub> | Hardly useful                                      |    |
| <input type="checkbox"/> <sub>4</sub> | Not useful at all                                  |    |
| <input type="checkbox"/> <sub>5</sub> | To my knowledge, no training courses were offered. |    |

### Questions for specialists only

#### How useful were the joint, quarterly rounds with specialists and nursing staff?

- |                                       |                                                                                     |    |
|---------------------------------------|-------------------------------------------------------------------------------------|----|
| <input type="checkbox"/> <sub>1</sub> | Very useful                                                                         | 25 |
| <input type="checkbox"/> <sub>2</sub> | Useful                                                                              |    |
| <input type="checkbox"/> <sub>3</sub> | Hardly useful                                                                       |    |
| <input type="checkbox"/> <sub>4</sub> | Not useful at all                                                                   |    |
| <input type="checkbox"/> <sub>5</sub> | To my knowledge, there were no quarterly rounds with specialists and nursing staff. |    |

Starting here: Questions for both **general practitioners and specialists**

## Changes in quality of care

The following questions ask you to assess the changes in the quality of care provided to nursing home residents that occurred due to the measures implemented by CoCare.

| Please choose only <i>one</i> option per item.                                                     |                          |                          |                          |                          |                          |    |
|----------------------------------------------------------------------------------------------------|--------------------------|--------------------------|--------------------------|--------------------------|--------------------------|----|
|                                                                                                    | strongly<br>disagree     | disagree                 | agree                    | strongly<br>agree        | don't<br>know            |    |
| Cooperation between doctors and nursing staff concerning patient care has been improved by CoCare. | <input type="checkbox"/> | 26 |
| Organisation of rounds has been improved by CoCare.                                                | <input type="checkbox"/> | 27 |
| Documentation of rounds has been improved by CoCare.                                               | <input type="checkbox"/> | 28 |
| The implementation of doctor's orders has been improved by CoCare.                                 | <input type="checkbox"/> | 29 |
| Nursing staff's preparation of rounds has been improved by CoCare.                                 | <input type="checkbox"/> | 30 |
|                                                                                                    | 1                        | 2                        | 3                        | 4                        | 5                        |    |

Personal information

|                                           |                                                                                                     |
|-------------------------------------------|-----------------------------------------------------------------------------------------------------|
| When did you complete this questionnaire? |                                                                                                     |
| Date                                      | <div><div></div><div></div><div></div><div></div><div></div><div></div><div></div><div></div></div> |
| 31                                        |                                                                                                     |

|                                         |                                                           |
|-----------------------------------------|-----------------------------------------------------------|
| Your age                                | Your gender                                               |
| <div><div></div><div></div></div> years | <div><div></div> Male</div> <div><div></div> Female</div> |
| 32                                      | 1 2 33                                                    |

|                                             |                                   |
|---------------------------------------------|-----------------------------------|
| You are enrolled in CoCare as...            |                                   |
| <div><div></div> General practitioner</div> | <div><div></div> Specialist</div> |
| 1                                           | 2 34                              |

|                                                                            |
|----------------------------------------------------------------------------|
| If you have any comments, questions or concerns, please provide them here: |
| <div></div> <div></div> <div></div> <div></div>                            |
| 35                                                                         |

Thank you for your support!
